1 **Forward genetic screens identified mutants with defects in trap morphogenesis**

2 **in the nematode-trapping fungus *Arthrobotrys oligospora***

3 Tsung-Yu Huang<sup>\*, †</sup>, Yi-Yun Lee<sup>\*, ‡</sup>, Guillermo Vidal-Diez de Ulzurrun<sup>\*</sup>,

4 Yen-Ping Hsueh<sup>\*, †, ‡, §</sup>

5 <sup>\*</sup>Institute of Molecular Biology, Academia Sinica, Nangang, 128 Academia Road,

6 Section 2, Nangang, Taipei, Taiwan

7 <sup>†</sup>Department of Biochemical Science and Technology, National Taiwan University No.

8 1, Sec. 4, Roosevelt Road, Taipei, Taiwan

9 <sup>‡</sup>Department of Genome and Systems Biology Degree Program, National Taiwan

10 University and Academia Sinica, Taipei 106, Taiwan

11

12

13

14

15

16 <sup>§</sup> Corresponding author

17 Institute of Molecular Biology

18 Academia Sinica

19 128 Academia Road, Section 2, Nangang,

20 Taipei, 115 Taiwan

21 Email: [pinghsueh@gate.sinica.edu.tw](mailto:pinghsueh@gate.sinica.edu.tw)

22 Phone: 886-2-2789-9313

23 **Abstract**

24 Nematode-trapping fungi (NTF) are carnivorous fungi that prey on nematodes under  
25 nutrient-poor conditions via specialized hyphae that function as traps. The molecular  
26 mechanisms involved in the interactions between nematode-trapping fungi and their  
27 nematode prey are largely unknown. In this study, we conducted forward genetic  
28 screens to identify potential genes and pathways that are involved in trap  
29 morphogenesis and predation in the NTF *Arthrobotrys oligospora*. Using Ethyl  
30 methanesulfonate and UV as the mutagens, we generated 5552 randomly-  
31 mutagenized *A. oligospora* strains and identified 15 mutants with strong defects in  
32 trap morphogenesis. Whole genome sequencing and bioinformatic analyses revealed  
33 mutations in genes with roles in signaling, transcription or membrane transport that  
34 may contribute to the defects of trap morphogenesis in these mutants. We further  
35 conducted functional analyses on a candidate gene, *YBP-1*, and demonstrate that  
36 mutation of that gene was causative of the phenotypes observed in one of the mutants.  
37 The methods established in this study might provide helpful insights for establishing  
38 forward genetic screening methods for other non-model fungal species.

39

40

41

## 42 **Introduction**

43 Model organisms have contributed enormously to unraveling the fundamental  
44 principles of biology. However, in some cases, model organisms might not be the most  
45 ideal investigatory system and studies on non-model species could better answer  
46 specific questions (Russell et al., 2017). Fortunately, by adopting increasingly more  
47 affordable and advanced next-generation sequencing technologies, intensive study at  
48 molecular and cellular levels of non-model species is now possible (Ellegren and  
49 evolution, 2014).

50 The fungal kingdom harbors rich biodiversity, with an estimated ~12 million  
51 species (Wu et al., 2019). Apart from for several model yeast and filamentous species,  
52 particularly pathogenic ones, we have very limited molecular or cellular knowledge on  
53 the vast majority of fungi. Fungi occur in essentially all habitats on Earth, and many  
54 species have evolved unique traits. For example, many species of Orbiliaceae  
55 (Ascomycota) are predatory fungi that prey on nematodes when local nutrients are  
56 scarce by means of specialized mycelial structures. More than 200 of these nematode-  
57 trapping fungi (NTF) have been described to date, with *Arthrobotrys oligospora* being  
58 the best studied species (Nordbring-Hertz et al., 2011). *A. oligospora* is known to  
59 eavesdrop on nematode ascaroside pheromones to trigger trap morphogenesis and to  
60 produce volatile compounds mimicking food and sex cues that lure nematodes, and

61 predatory abilities among natural populations of this species can vary considerably  
62 (Hsueh et al., 2017; Hsueh et al., 2013; Yang et al., 2020).

63 NTF hold great promise as biocontrol agents to combat plant-parasitic nematodes,  
64 which have been estimated to cause USD\$ 80 million in crop loss annually (Gray, 1983;  
65 Lopez-Llorca et al., 2007; Wang et al., 2015). However, since we know little about their  
66 biology and the cellular/molecular mechanisms governing the switch from saprophytic  
67 to predatory lifestyles, the full nematocidal potential of NTF cannot yet be harnessed.  
68 Nematode-derived cues are key signals triggering the switch to a predatory lifestyle  
69 switch in NTF (Hsueh et al., 2013). Consequently, signaling pathways could be  
70 anticipated to play vital roles in this lifestyle switch. Indeed, a few such genes have  
71 been demonstrated as necessary for trap morphogenesis in *A. oligospora*. These  
72 include the mitogen-activated protein kinase (MAPK), Slf2, which is involved in the  
73 cell wall integrity signaling pathway in yeast (Zhen et al., 2018), a pH-sensing receptor,  
74 palH, that functions in the pH signal transduction pathway, and a NADPH oxidase,  
75 NoxA, that controls ROS signaling responses in *A. oligospora* (Li et al., 2019; Li et al.,  
76 2017). More recently, it has been demonstrated that the G protein beta subunit, Gpb1,  
77 is required for the predatory lifestyle transition in *A. oligospora* (Yang et al., 2020).  
78 Nevertheless, more intensive study is needed to gain further insight into the  
79 mechanisms governing these inter-kingdom predator-prey interactions.

80 In this study, we have established methods for conducting forward genetic screens  
81 of *A. oligospora*. By applying this approach together with whole genome sequencing,  
82 we demonstrated that it is possible to identify genes playing important roles in trap  
83 morphogenesis and, further, to unveil the causative mutation in a mutant that failed to  
84 develop traps without the need to conduct genetic crosses. Our work illustrates that it  
85 is feasible to conduct random mutagenesis on a fungal species for which the sexual  
86 cycle has not been well studied in the laboratory and to identify causative mutations for  
87 phenotypic traits. Through our forward genetic screens, we have identified novel  
88 players necessary for the predatory lifestyle of *A. oligospora*.

89

## 90 **Materials and methods**

### 91 **Strains, media, culture conditions**

92 *Arthrobotrys oligospora* strain TWF154 was used in this study, a wild isolate we  
93 have sampled in Taiwan. Genomic data on this strain can be accessed from the National  
94 Center for Biotechnology Information GenBank under accession number  
95 SOZJ000000000 (Yang et al., 2020). All corresponding knockout mutants were obtained  
96 in a *ku70* strain background. Our use of *ku70* protoplasts increased the efficiency of  
97 targeted gene knockout as cells may fail to enter the nonhomologous end-joining  
98 pathway without Ku70 protein, resulting in greater likelihood of undergoing

99 homologous recombination during DNA repair.

100 We used potato dextrose agar (PDA) and low nutrient medium (LNM) as fungal  
101 solid media, whereas yeast nitrogen base without amino acids (YNB) and potato  
102 dextrose broth (PDB) acted as liquid media. We used *Caenorhabditis elegans* wild-type  
103 strain N2 as nematode prey, which were maintained on nematode growth media (NGM)  
104 plates with *Escherichia coli* OP50 as food. All cultures were incubated at 25 °C.

### 105 **Mutagenesis**

106 TWF154 was cultured on PDA for 5 days and the hyphae and spores were  
107 collected into 50 ml PDB for liquid culture. After culturing for 2 days at 25 °C, the  
108 liquid culture was blended and then treated with 10 ml Vino Taste Pro (80 mg/ml in  
109 MN buffer) and chitinase for 8-10 h at 30 °C and 200 rpm in an incubator to digest  
110 fungal cell walls. Digested cells were then filtered through two layers of sterile  
111 miracloth (EMD Millipore) and washed with sterile STC buffer (1.2 M D-Sorbitol, 10  
112 mM Tris-HCl (pH 7.5), 50 mM CaCl<sub>2</sub>).

113 Next, we spread  $5 \times 10^4$  protoplasts onto a regeneration plate and subjected them to  
114 a treatment of either 6 sec of 15 W UV or 12 µg/ml ethyl methanesulfonate (EMS) to  
115 cause random mutations in the genomes. Plates were then cultured under dark  
116 conditions at 25 °C to prevent DNA repair. Any colonies formed were then further  
117 inoculated onto PDA 48-well plates.

## 118 **Genetic screen on mutants with trapping defects**

119 To screen out mutants exhibiting defects in trapping *C. elegans*, colonies that grew  
120 after mutagenesis were inoculated onto LNM 48-well plates. Colonies in each well were  
121 then exposed overnight to thirty specimens of N2, and those exhibiting weak trapping  
122 ability after 24 hours were selected for rescreening. The rescreening process was  
123 conducted on 5-cm LNM plates on which mutant fungal lines were exposed to ~100  
124 N2. By rescreening we could exclude false positive mutants, resulting in more accurate  
125 phenotyping of trapping defects.

## 126 **Trap quantification**

127 To quantify trap formation, fungal strains were inoculated onto fresh 3-cm LNM  
128 plates and grown for 3 days. Then, thirty L4 larval-stage N2 were added to the plate  
129 and washed away after 6 hours. Fungal cultures were incubated at 25 °C and we  
130 calculated number of traps from half of the plate after 24 hours and presented the results  
131 in traps/cm<sup>2</sup>.

## 132 **Visualization of trap morphology**

133 Fungal strains were inoculated onto 12-well LNM plates, and 0.1% SCRI  
134 Renaissance 2200 (SR2200; a dye that binds to beta-1,3-glucan) was added to the  
135 medium. Thirty L4 larval-stage N2 were added to the plates and 24-h later the plates  
136 were imaged at 40x magnification using an Axio Observer Z1 system.

## 137 **Whole-genome sequencing analysis**

138 Genomic DNA extracted from 16 mutants was subjected to whole genome  
139 sequencing using an Illumina sequencing system. Approximately 18 million reads were  
140 trimmed to generate a 250 base-pair (bp) library and a paired-end sequencing protocol  
141 enabled us to derive more accurate sequencing results.

142 For data analysis, index files from the TWF154 reference genome (Yang et al.,  
143 2020) were created using samtools (Li, 2011) and bwa (Li and Durbin, 2009). Then, we  
144 trimmed the adaptors with Trimmomatic (Bolger et al., 2014) and filtered out low-  
145 quality reads from each of the sequenced mutants. Trimmed reads from each mutant  
146 were aligned to the reference genome using bwa-mem (Li, 2013) and converted to  
147 BAM files. Next, we used Picard (Picard toolkit., 2019) to identify duplicates, and  
148 GATK (Poplin et al., 2017) was employed for SNV (single nucleotide variation) and  
149 INDEL (insertion/deletion) calling in each file. Two separate files of all variants were  
150 then generated, one of which contained only INDELS and the other only SNPs. To focus  
151 on the most relevant mutations, the SNP and INDEL files were filtered using gatk  
152 VariantFiltration and gatk SelectVariants (Poplin et al., 2017) with the following criteria:  
153  $QD < 2.0$ ,  $MQ < 40.0$ ,  $QUAL < 100$ ,  $MQRankSum < -12.5$ ,  $SOR > 4.0$ ,  $FS > 60.0$ ,  
154  $ReadPosRankSum < -8.0$ . The mutations were annotated in ANNOVAR (Wang et al.,  
155 2010) by comparing the files to the reference genome. To narrow down potential



156 candidate genes, we focused on exonic regions and excluded synonymous mutations as  
157 well as mutations occurring more than twice among the mutants. Genes potentially  
158 contributing to trapping defects were validated by gene ontology prediction.

## 159 **Transformation**

160 We placed  $10^6$  protoplasts on ice in a 50-ml centrifuge tube for 30 min with 5  $\mu$ g  
161 of knockout cassette DNA (see below). Then, five volumes of PTC buffer (40%  
162 polyethylene glycol 3350, 10 mM Tris-HCl (pH 7.5), 50 mM  $\text{CaCl}_2$ ) was added and  
163 gently mixed by inverting the tube. After multiple inversions, the tube was kept at room  
164 temperature for 20 min. Lastly, protoplasts were mixed with regeneration agar (3%  
165 acid-hydrolyzed casein, 3% yeast extract, 0.5 M sucrose, 10% agar) and 200  $\mu$ g/ml  
166 Nourseothricin Sulfate (clonNAT).

## 167 **Construction of gene knockout cassettes**

168 Gene knockout cassettes consisted of three fragments, i.e., 2-kb homologous  
169 sequences of the 5' and 3' untranslated region (UTR) of the target gene flanking a  
170 nourseothricin acetyltransferase gene (*NATI*). Two homologous sequences were  
171 designed to overlap with the *NATI* gene. The three fragments were amplified separately,  
172 and these were then conjoined into complete cassettes by amplifying using nested  
173 primers targeting to both ends of the cassette.

## 174 **Confirmation of gene knockouts in mutants**

175 To confirm knockout by PCR, we used two pairs of primers, each pair having one  
176 primer in the DNA flanking the targeted region to be knocked out and one in the *NATI*  
177 gene, and amplified both intervening junctions. Another PCR reaction, using the two  
178 primers within the targeted region, was also performed to confirm the absence of the  
179 knockout gene, thereby ruling out the possibility of a duplication event.

180 Moreover, Southern blots were conducted on transformants to confirm knockout  
181 and to check if there had been any ectopic integrations of the drug-resistance cassette  
182 elsewhere in the genome.

### 183 **Rescue assay on EYR41\_001410 in the TWF1042 mutant**

184 Constructs were amplified from 2-kb upstream to 1-kb downstream of the  
185 EYR41\_001410 sequence and fused with a G418 (Geneticin) drug cassette. We  
186 transformed 5  $\mu\text{g}$  of constructs into  $2.5 \times 10^5$  of TWF1042 protoplasts and cultured them  
187 with 200  $\mu\text{g}/\text{ml}$  of G418. Any resulting colonies were inoculated onto PDA plates with  
188 150  $\mu\text{g}/\text{ml}$  G418 for confirmation.

189

190

191

192

193

## 194 **Results**

### 195 **Forward genetic screening identifies *A. oligospora* mutants with trapping defects**

196 To establish a protocol for forward genetic screens that could identify genes  
197 involved in the trapping process of NTF, we optimized the mutagenesis conditions for  
198 a lethal dose (LD<sub>50</sub>) using EMS- or UV-treated protoplasts (6 seconds of 15 W UV or  
199 12 µg/ml EMS). Then, the resulting 5552 mutagenized clones (1560 from UV- and 3992  
200 from EMS-based mutagenesis) were isolated onto 48-well plates. We screened these  
201 5552 mutant lines twice and identified 15 that exhibited defects in capturing *C. elegans*  
202 (Fig. 1). Unlike control wild-type strain TWF154, which formed numerous traps and  
203 captured all 30 *C. elegans* within 12 hours of our nematode-trapping assay, many live  
204 nematodes were still crawling over the mutant strains within the same timeframe and  
205 the mutants presented few or no traps (Fig. 2). Interestingly, some of the mutants  
206 exhibited delayed trap formation, with traps eventually being formed 24 hours after  
207 exposure to *C. elegans* (Supplementary figure 1). In summary, all of the mutants  
208 isolated from our genetic screens exhibit defects in trap development in the presence of  
209 nematode prey.

### 210 **Phenotypic characterization of the 15 mutants exhibiting trapping defects**

211 We further quantified their trap-forming capabilities in all 15 mutants that we had  
212 isolated from the genetic screens. We found that all mutant lines developed fewer traps

213 relative to wild-type upon exposure to the same number of nematode prey, with trap  
214 morphogenesis being completely abolished in six of the mutant lines (Fig. 3A).

215 We then examined the morphology of the traps developed by these 15 mutants.  
216 The traps generated by wild-type *A. oligospora* are three-dimensional structures  
217 consisting of several loops of hyphae of varying size. In contrast, the traps formed by  
218 the mutants tended to have abnormal morphologies, either because the loops failed to  
219 fuse or the loops were irregularly shaped (Fig. 3B). It has been demonstrated previously  
220 that intercellular communication is critical for trap formation (Nordbring-Hertz et al.,  
221 2011; Youssar et al., 2019), so these phenotypes could result from deficient  
222 communication between hyphal cells or defects in initiating trap morphogenesis. Many  
223 of the mutants exhibited vegetative hyphal protrusions in response to nematode  
224 presence but were incapable of completing trap morphogenesis, some developed  
225 rudimentary traps, and others completely lacked any trap-like structures (Fig. 3B).

226 Next, we tested if these mutants exhibit general growth defects by culturing them  
227 on the rich medium potato dextrose agar (PDA). Four out of fifteen mutant lines showed  
228 growth defects relative to the wild-type strain, suggesting that these particular mutant  
229 lines harbor mutations in genes that may play pleiotropic roles in general growth (Fig.  
230 3C). The remaining 11 mutants displayed no overt growth differences compared to  
231 wild-type, implying that the mutated genes might play more specific roles in *A.*

232 *oligospora* trap formation.

233 **Whole genome sequencing analysis of the 15 mutant lines identifies potential**  
234 **candidate genes involved in trap morphogenesis**

235 To identify the mutations in the genomes of the 15 mutant lines, we conducted  
236 whole genome sequencing and remapped all sequencing data to the wild-type TWF154  
237 reference genome. On average, 2700 mutations encompassing noncoding and coding  
238 sequences were identified in each of these mutants, but many of those mutations were  
239 common to all mutant lines, perhaps representing background mutations between the  
240 mutagenized clone and the original sequenced clone (Supplementary figure 2). Such  
241 mutations were ruled out from further analyses (Table 1). Of the 10-89 mutations  
242 remaining in each of the mutant lines, we focused on those occurring within exonic  
243 sequences to further refine the group of candidate genes (Table 1). In certain mutant  
244 lines, such as TWF1037, TWF1042, TWF1046 and TWF1073, we identified mutations  
245 in exons of more than 20 genes, whereas for two mutant strains (TWF1033 and  
246 TWF1034) we did not identify any coding genes with mutations, indicating that the  
247 mutations that caused trapping defects in these two latter mutants likely occur in  
248 noncoding regions of the genome.

249 In the final step of our mutation selection process, we excluded genes having  
250 synonymous mutations, and selected genes that gained a misplaced stop codon for

251 further functional studies (Table 1). We identified loss-of-function mutations, such as  
252 stop gain mutations, frameshift indels, and nonsynonymous SNV, among the mutants  
253 (Fig. 4). We used gene ontology analysis to predict the functions of the mutated genes  
254 identified from our sequencing analyses and discovered that they play roles in signaling,  
255 transcription or membrane transport (Supplementary Table 2). Together, these analyses  
256 have revealed a set of genes that, when mutated, may contribute to the phenotype of  
257 impaired trap formation and nematode predation.

258

259 **Frameshift indel mutation in gene EYR41\_001410 induces phenotypic defects in**  
260 **the TWF1042 mutant strain**

261 To further assess identified candidate mutated genes and establish which mutations  
262 were causative for the phenotypes observed in the mutants, we focused on mutant strain  
263 TWF1042 that had mutations in seventeen candidate genes, including three frameshift  
264 indel mutations (Fig. 4). Reasoning that these three frameshift mutations likely  
265 abolished the respective protein function, we examined our gene ontology predictions  
266 and discovered that one putative sequence had a protein kinase domain  
267 (EYR41\_005093), another had a YAP-binding/ALF4/Glomulin domain  
268 (EYR41\_001410), and the other was of unknown function (EYR41\_008629). In  
269 *Saccharomyces cerevisiae*, YAP-binding proteins function in responses to oxidative

270 stress (Gulshan et al., 2004). In *Arabidopsis thaliana*, Aberrant root formation protein  
271 4 (Alf4) is involved in the initiation of lateral root formation (DiDonato et al., 2004).  
272 Deletion of the *Glomulin* gene was reported to affect differentiation in vascular smooth  
273 muscle cells in mouse (Arai et al., 2003). Given these diverse biological functions of  
274 the YAP-binding/ALF4/Glomulin protein family, we hypothesized that the protein  
275 encoded by *EYR41\_001410* in *A. oligospora*, which we have named *YPBI* (YAP-  
276 binding protein 1), might play an important role in hyphal growth in this fungus. *YPBI*  
277 appears to be a rapidly-evolving gene. It shares ~70% protein sequence identity among  
278 NTF, but only ~20% protein sequence identity with other ascomycetes (Fig. 5A).  
279 Consequently, the YAP-binding protein gene family may play diverse roles in a variety  
280 of fungal species.

281 To study the function of *YPBI*, we constructed a gene deletion mutant via  
282 homologous recombination and examined the phenotypes of the resulting *ypb1* mutant.  
283 We found that *ypb1* displayed phenotypes similar to those exhibited by our randomly  
284 mutagenized strain, TWF1042, including slow growth, lack of conidiation and severe  
285 defects in trap formation (Fig. 5B and C). These results indicate that the frameshift  
286 insertion mutation in *YPBI* likely caused the phenotypic defects observed in strain  
287 TWF1042. To validate that supposition, we expressed the wild-type allele of *YPBI*  
288 under its endogenous promoter in TWF1042 to examine if addition of a wild-type copy

289 of *YPBI* could rescue the phenotypic defects displayed by TWF1042. Indeed, addition  
290 of the wild-type *YPBI* allele to TWF1042 complemented its defects in trap formation,  
291 growth, and conidiation, demonstrating that the frameshift insertion mutation of *YPBI*  
292 caused the phenotypic defects observed for TWF1042 (Fig. 5C).

293

## 294 **Discussion**

295 In this study, we established a protocol to conduct forward genetic screens in the  
296 NTF, *A. oligospora*. We used EMS or UV to mutagenize protoplasts and screened out  
297 fifteen mutants exhibiting defects in trap formation. Subsequent whole genome  
298 sequencing identified candidate genes harboring mutations in these mutants. Finally,  
299 we demonstrate that a frameshift mutation of the YAP-binding/ALF4/Glomulin  
300 domain-containing gene, *YPBI*, caused the nematode-trapping defects observed in one  
301 of the randomly-mutagenized mutant strains, TWF1042.

302 Although we identified 15 mutants with defects in trap morphogenesis from our  
303 genetic screens, we consider the success rate in isolating mutants to be low (15 out of  
304 ~5,500 mutagenized clones), and our screens were far from achieving mutagenesis  
305 saturation. We believe that two factors contributed to this result. First, mutagen dosages  
306 may have been too light and, second, some of our mutagenized clones could be  
307 heterokaryons of mixed genetic backgrounds, which could mask phenotypes caused by



308 mutations. We purposely used lower mutagen dosages because laboratory methods for  
309 conducting genetic crosses of *A. oligospora* have yet to be established. If too many  
310 mutations had been generated in the background genome, it would be challenging to  
311 identify the mutations causing the observed phenotypes without undertaking genetic  
312 mapping analyses. Since the hyphae of *A. oligospora* contain multiple nuclei, it is  
313 possible that a small proportion of the protoplasts we generated and mutagenized  
314 harbored more than one nucleus, and it is also possible that some of the single mycelium  
315 colonies we isolated had fused with a neighboring colony of a different genetic  
316 background. Both scenarios could lead to heterokaryons occurring in our *A. oligospora*  
317 mutant libraries.

318 We believe that to make forward genetic screening even more applicable to NTF  
319 study, laboratory genetic crosses must be established. Doing so would enable  
320 significantly higher mutagen dosages to be applied, rendering mutant identification  
321 more efficient. In summary, we have established a method for conducting random  
322 mutagenesis in a non-model fungus, followed by resequencing of the mutants to  
323 identify candidate genes contributing to observed phenotypes. We have revealed that  
324 YBP1 plays a critical role in the physiology and development of *A. oligospora* and also  
325 identified several other candidate genes in which mutations might cause defects in trap  
326 morphogenesis. We envisage that our methodology could facilitate future genetic

327 studies in other enigmatic fungi.

328 **Acknowledgments**

329 The authors thank the IMB genomic core for conducting Illumina sequencing and

330 John O'Brien's comments on the manuscript. This work was supported by Academia

331 Sinica Career Development Award AS-CDA-106-L03 and Taiwan Ministry of Science

332 and Technology grant 106-2311-B-001-039-MY3 to YPH.

333

334

335 **Figures**

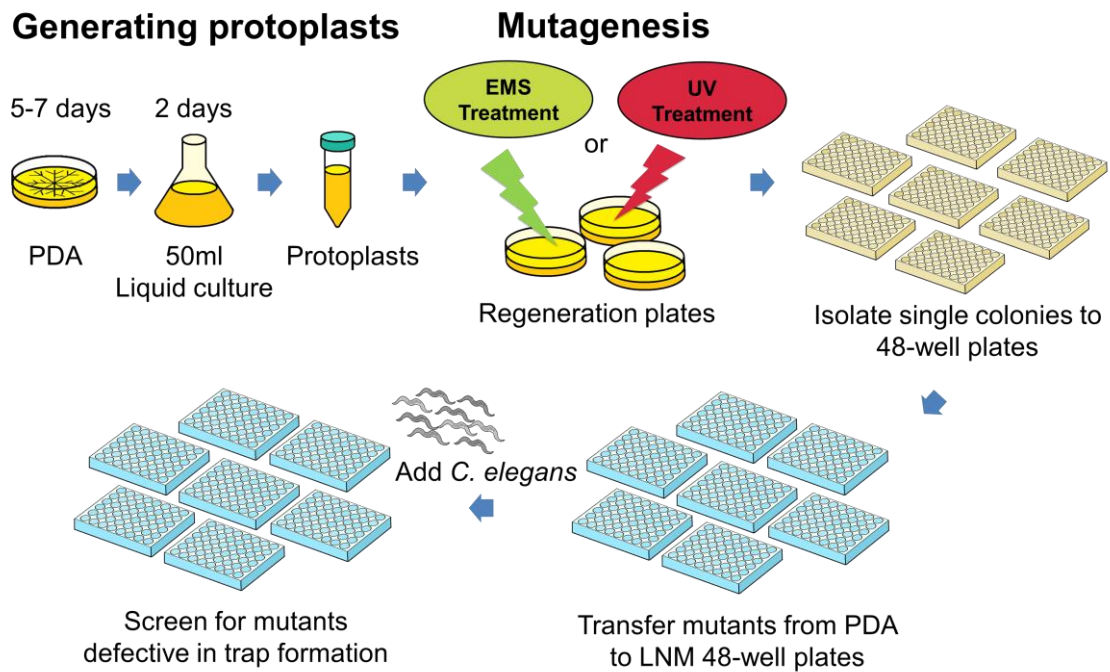

336

337 Fig. 1 Schematic of our workflow for random mutagenesis and forward genetic screening of *A.*

338 *oligospora*. Protoplasts were acquired from PDB liquid culture and were subsequently treated

339 with EMS or UV for mutagenesis. The resulting colonies were separated out into 48-well PDA

340 plates and screened on LNM plates. Mutants with trapping defects were selected after a

341 rescreening process.

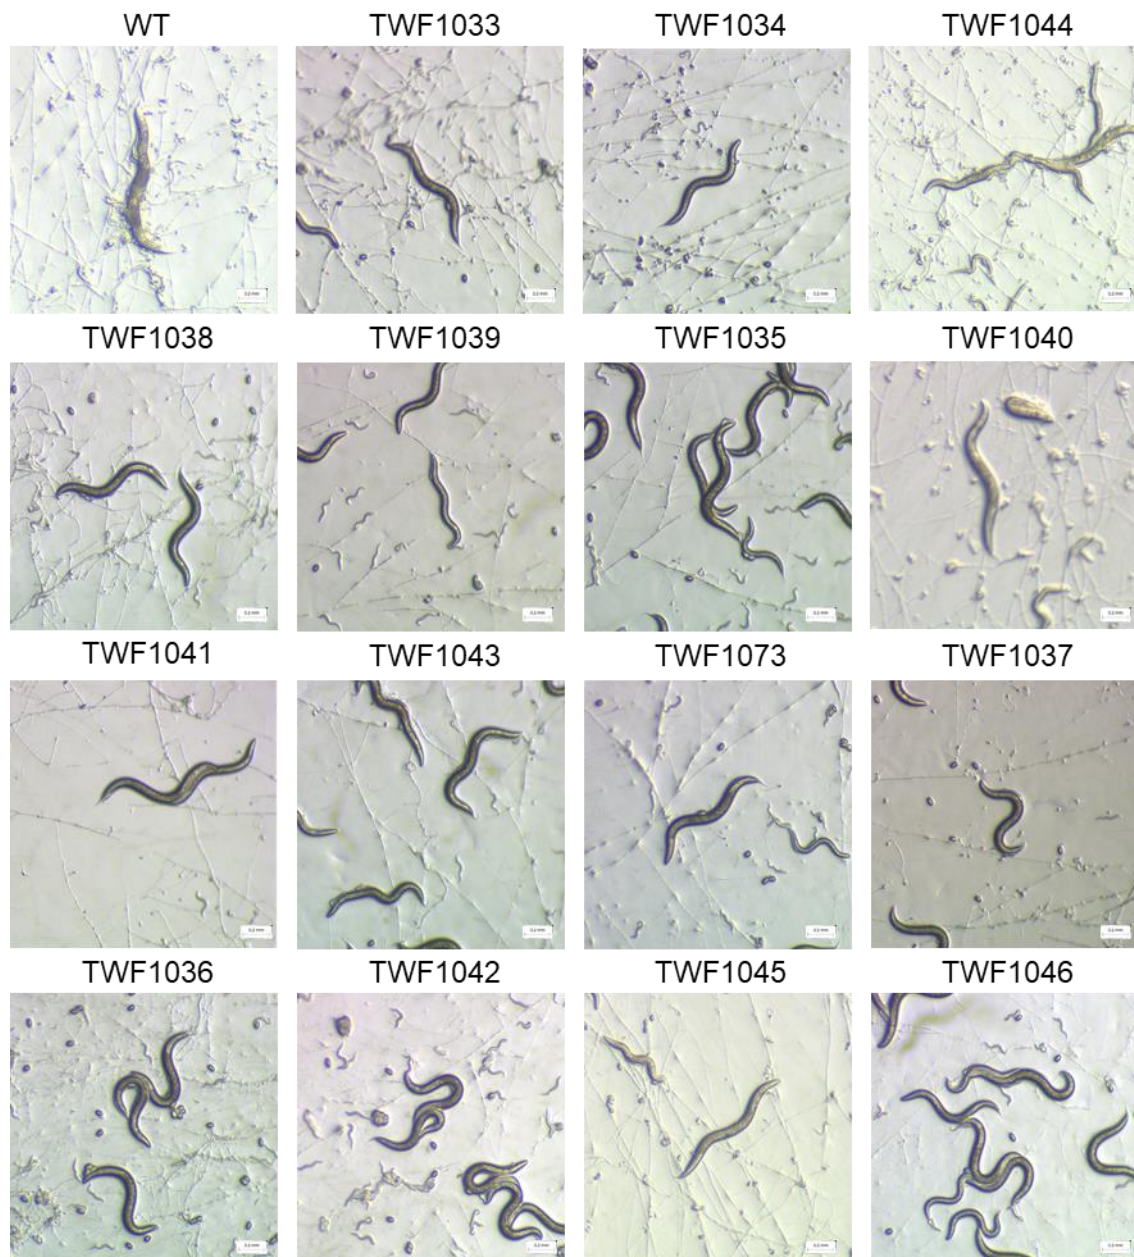

342

343 Fig. 2 Random mutagenesis and genetic screening identified 15 *A. oligospora* mutants

344 with defects in trap morphogenesis. All images are of *A. oligospora* upon 12-h exposure

345 to N2 *C. elegans*.

346

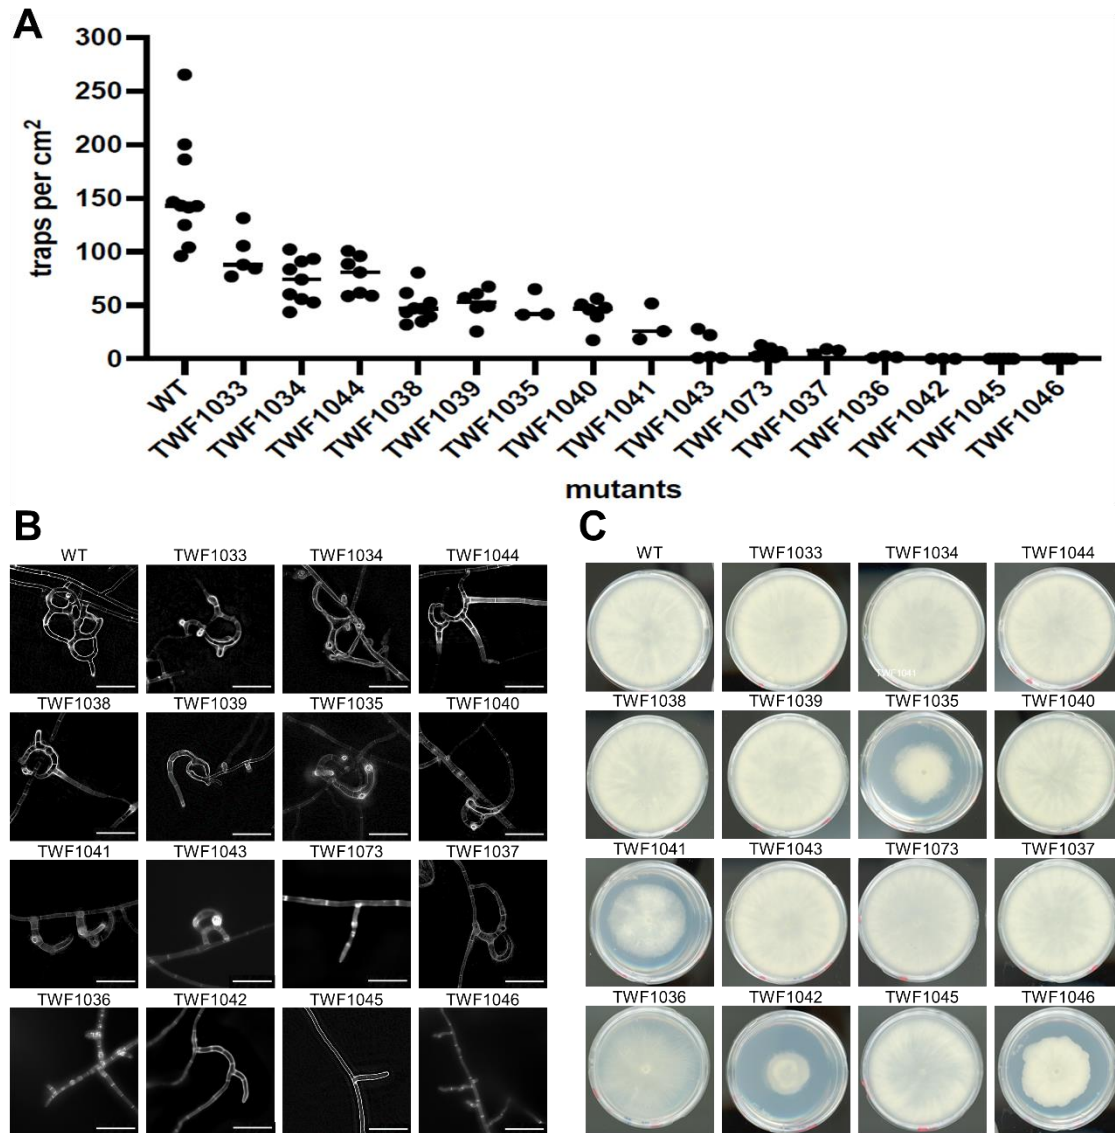

347

348 Fig. 3 Phenotypic characterization of the 15 mutants identified from our forward genetic

349 screen. (A) Quantification of trap numbers induced by *C. elegans* for the WT and 15

350 mutant lines. (B) Microscopic analyses of trap morphology for WT and the 15 mutant

351 lines. Bars, 50  $\mu$ m. (C) Growth of WT and 15 mutant lines on PDA plates (5-cm diameter)

352 by day 5.

353 Table 1. Summary of numbers of mutations (after filtering out common mutations) among the 15 mutant lines, as identified by whole  
 354 genome sequencing. Exonic mutations encompass frameshift indels, non-frameshift indels, non-synonymous, synonymous and stop-gain  
 355 mutations. Indel, insertion/deletion; SNV, single nucleotide variation.

| Mutant  | Upstream | Downstream | Intergenic | Intronic | 5'UTR | 3'UTR | Exonic | Frameshift indels | Non-frameshift indelss | Non-synonymous SNV | Synonymous SNV | Stop-gain | Total |
|---------|----------|------------|------------|----------|-------|-------|--------|-------------------|------------------------|--------------------|----------------|-----------|-------|
| TWF1033 | 1        | 3          | 6          | 1        | 0     | 0     | 0      | 0                 | 0                      | 0                  | 0              | 0         | 11    |
| TWF1034 | 1        | 2          | 5          | 2        | 0     | 0     | 0      | 0                 | 0                      | 0                  | 0              | 0         | 10    |
| TWF1035 | 4        | 4          | 7          | 4        | 1     | 0     | 3      | 1                 | 0                      | 2                  | 0              | 0         | 23    |
| TWF1036 | 5        | 8          | 9          | 2        | 2     | 4     | 8      | 1                 | 0                      | 6                  | 1              | 0         | 38    |
| TWF1037 | 10       | 6          | 28         | 5        | 9     | 7     | 24     | 0                 | 0                      | 18                 | 6              | 0         | 89    |
| TWF1038 | 5        | 6          | 8          | 7        | 2     | 2     | 12     | 0                 | 0                      | 6                  | 5              | 1         | 42    |
| TWF1039 | 2        | 5          | 10         | 0        | 2     | 1     | 10     | 0                 | 0                      | 7                  | 3              | 0         | 30    |
| TWF1040 | 5        | 7          | 5          | 1        | 2     | 1     | 10     | 0                 | 0                      | 7                  | 3              | 0         | 31    |
| TWF1041 | 3        | 5          | 9          | 4        | 4     | 1     | 17     | 1                 | 0                      | 12                 | 4              | 1         | 43    |
| TWF1042 | 13       | 3          | 15         | 8        | 4     | 0     | 26     | 3                 | 0                      | 14                 | 9              | 0         | 69    |
| TWF1043 | 6        | 7          | 11         | 10       | 2     | 2     | 12     | 0                 | 0                      | 6                  | 5              | 1         | 50    |
| TWF1044 | 5        | 2          | 6          | 7        | 4     | 2     | 3      | 0                 | 0                      | 2                  | 1              | 0         | 29    |
| TWF1046 | 14       | 3          | 12         | 11       | 9     | 5     | 26     | 2                 | 0                      | 9                  | 12             | 3         | 80    |
| TWF1073 | 28       | 6          | 4          | 6        | 14    | 4     | 22     | 9                 | 3                      | 4                  | 1              | 5         | 84    |

356

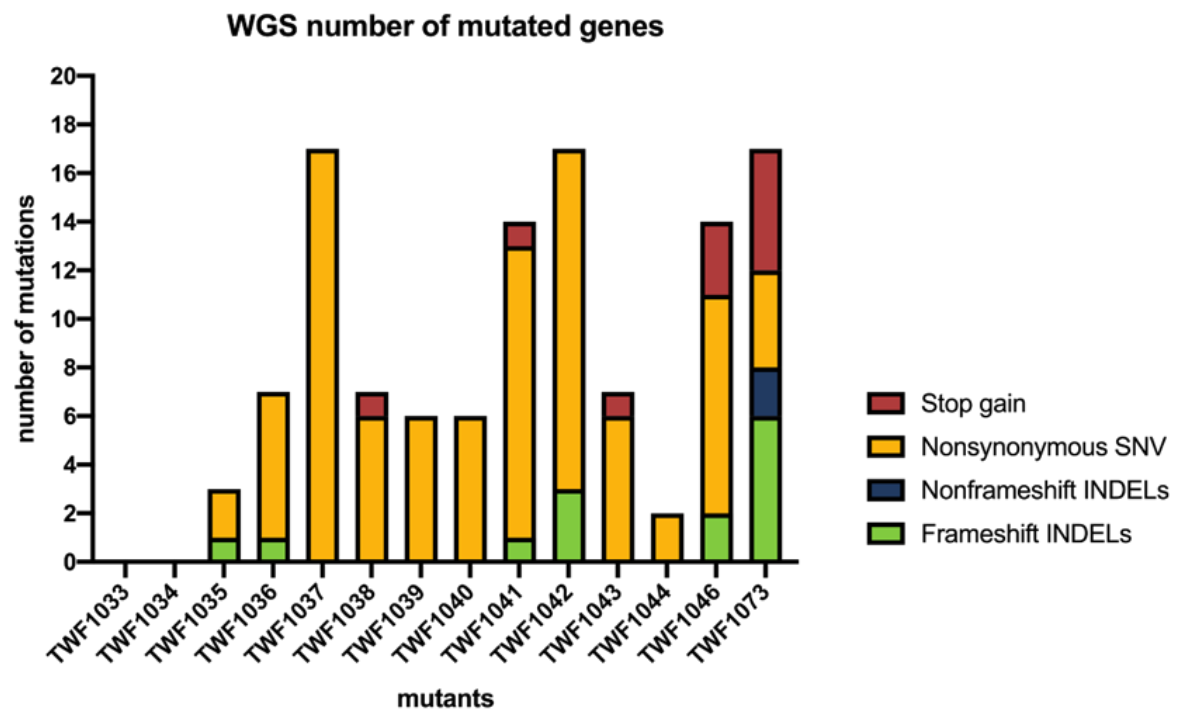

357

358 Fig. 4 Numbers of mutated genes (after filtration procedures) in each mutant.

359 Different colors represent different types of exonic mutations (excluding

360 synonymous mutations).

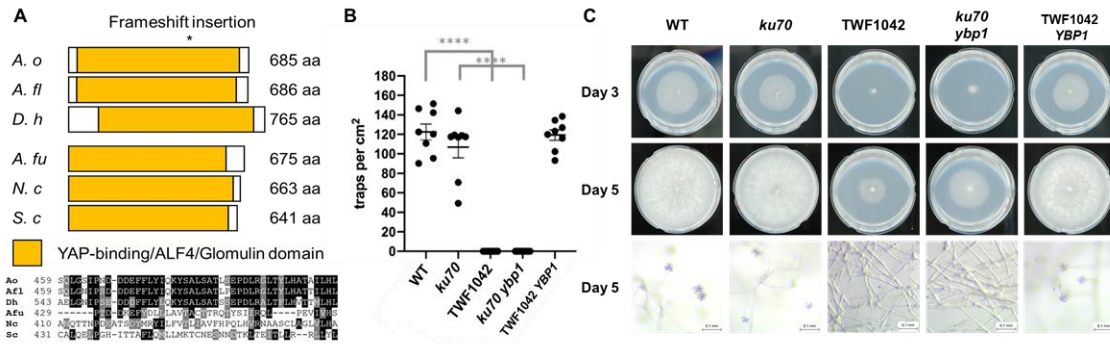

361

362 Fig. 5. Mutations in *YBP1* cause the phenotypic defects in growth, trap morphogenesis

363 and conidiation observed in the randomly-mutagenized strain TWF1042. (A)

364 Schematic representation of the domain structure and partial sequence alignment of *A.*

365 *oligospora* YBP1 and related fungal homologs. *A. oligospora* (*A. o.*), *Arthrobotrys*

366 *flagrans* (*A. fl.*), *Dactylellina haptotyla* (*D. h.*), *Aspergillus fumigatus* (*A. fu.*), *Neurospora*

367 *crassa* (*N. c.*), *Saccharomyces cerevisiae* (*S. c.*). Asterisk represents the site where

368 frameshift insertion was found. (B) Quantification of trap numbers induced by *C.*

369 *elegans* presence for the WT, *ku70*, TWF1042, *ku70 ybp1*, and a TWF1042-*YBP1*

370 rescue strain. (C) Representative images of growth (day 3), aerial hyphae (day 5), and

371 conidiation (day 5) for the WT, *ku70*, TWF1042, *ku70 ybp1*, and TWF1042-*YBP1*

372 rescue strain. Colonies were grown on PDA plates (5-cm diameter).



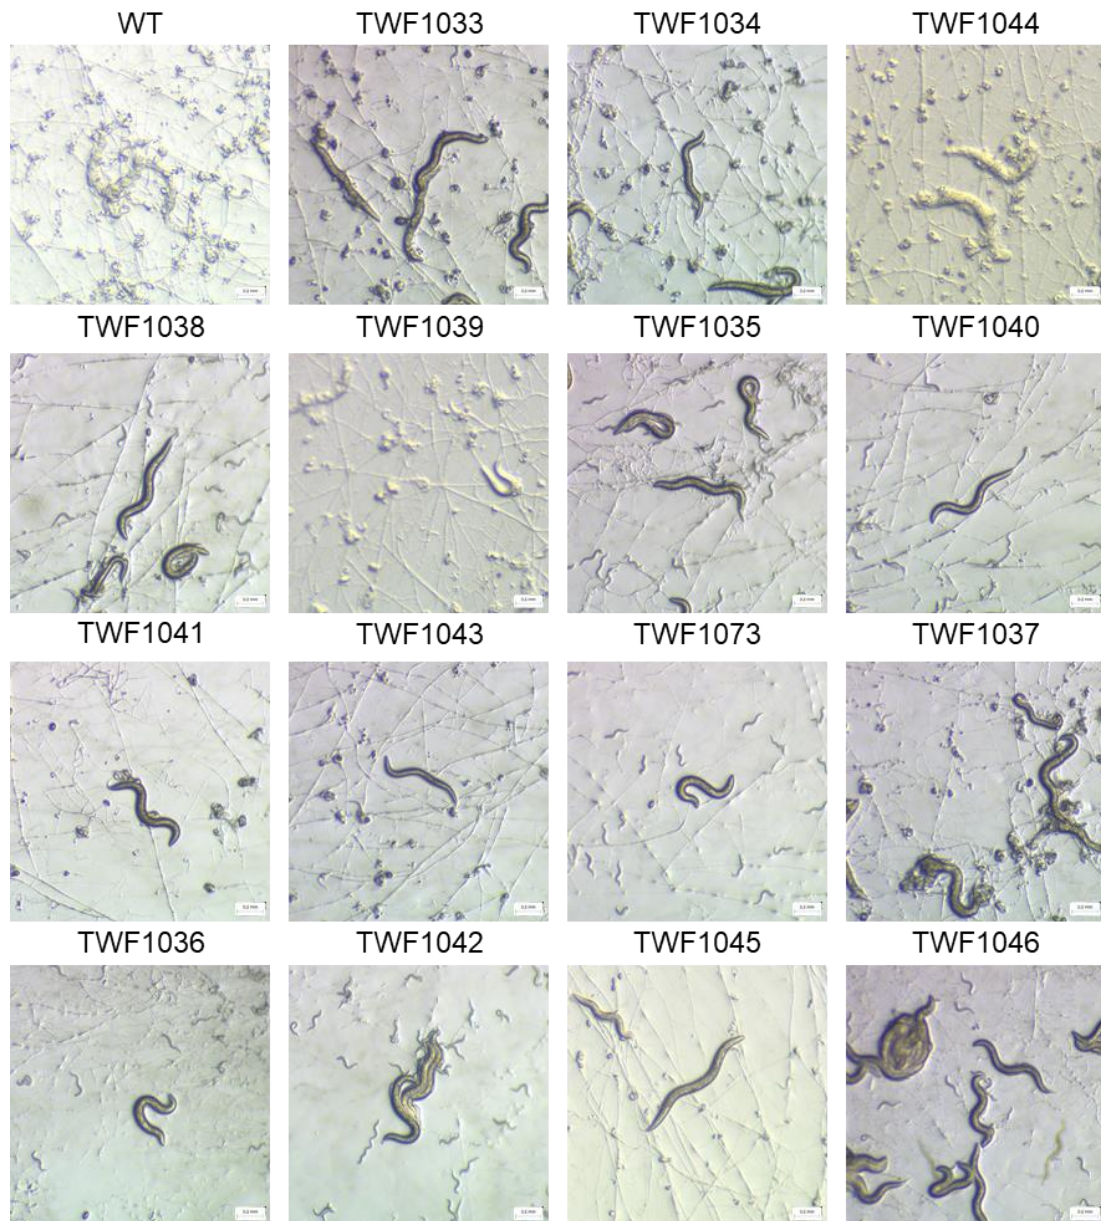

373

374 Supplementary fig.1 Random mutagenesis and forward genetic screening identified 15

375 mutants with defects in capturing *C. elegans*. *C. elegans* were paralyzed and dead in WT

376 group but there were still living worms in mutants. Micrographs were captured at the 24-

377 h time-point. Some mutants showed delayed trap formation and others still failed to form

378 traps.

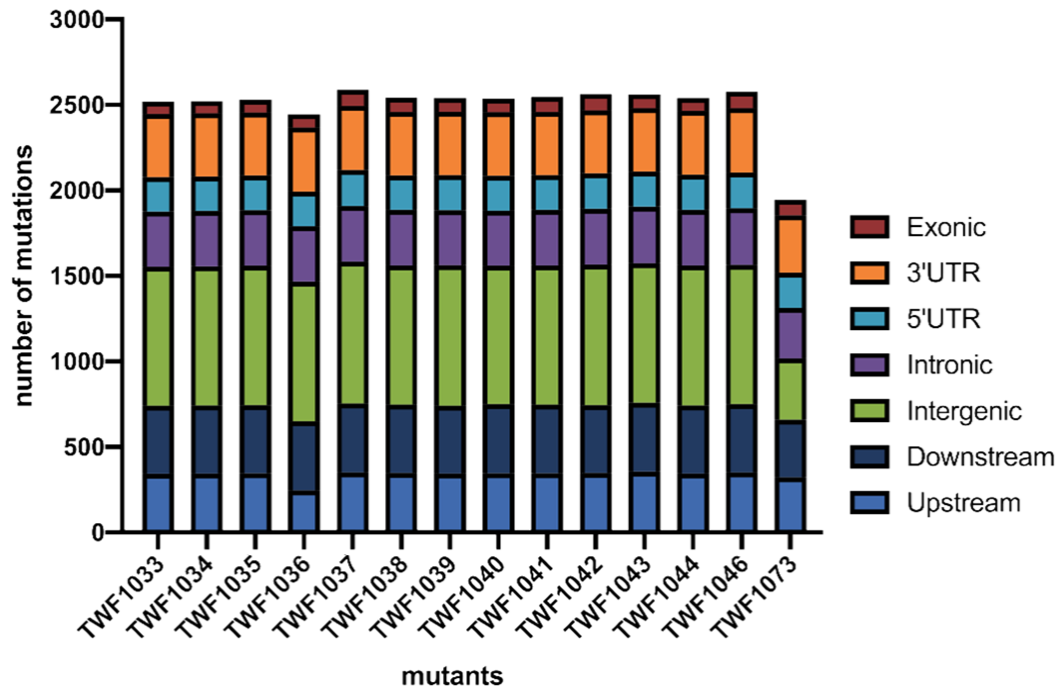

379

380 Supplementary fig. 2 Total mutations annotated for each mutant. Different types of

381 mutation are individually colored.

382 Supplementary Table 2. Information on selected genes (after filtration procedures) to conduct targeted gene knockout. “Chr” column presents the  
383 chromosome that the mutations were located. “Start” and “End” column present the exact sites where the mutations were found. “Ref” and “Alt”  
384 column present the nucleotides from reference genome and mutants respectively. “Exonic Func.” presents the type of the mutations. “GO terms”  
385 presents the predicted function of the gene.

| Mutant  | Gene         | Chr        | Start   | End     | Ref | Alt           | Exonic Func.         | GO terms                                      |
|---------|--------------|------------|---------|---------|-----|---------------|----------------------|-----------------------------------------------|
| TWF1035 | EYR41_000049 | scaffold_1 | 149046  | 149046  | -   | TCTGTAA       | frameshift insertion | Creatinase/aminopeptidase-like                |
| TWF1036 | EYR41_003391 | scaffold_2 | 2818724 | 2818724 | A   | G             | nonsynonymous SNV    | Major facilitator, sugar transporter-like     |
| TWF1036 | EYR41_009094 | scaffold_6 | 793179  | 793179  | T   | A             | nonsynonymous SNV    | Zinc finger, CCCH-type superfamily            |
| TWF1037 | EYR41_002645 | scaffold_2 | 399109  | 399109  | T   | A             | nonsynonymous SNV    | F-box-like domain superfamily                 |
| TWF1037 | EYR41_008023 | scaffold_5 | 1235392 | 1235392 | T   | A             | nonsynonymous SNV    | Protein kinase domain                         |
| TWF1038 | EYR41_005196 | scaffold_3 | 1505468 | 1505468 | -   | TA            | stop-gain            | MFS transporter superfamily                   |
| TWF1038 | EYR41_011609 | scaffold_8 | 2469219 | 2469219 | T   | A             | nonsynonymous SNV    | Cytochrome P450, E-class, group I             |
| TWF1039 | EYR41_008594 | scaffold_5 | 3072546 | 3072546 | G   | A             | nonsynonymous SNV    | Zinc finger, GATA-type;zinc finger, GATA-type |
| TWF1041 | EYR41_005971 | scaffold_3 | 3955532 | 3955532 | A   | T             | stop-gain            | Copper amine oxidase, catalytic domain        |
| TWF1042 | EYR41_001410 | scaffold_1 | 4520093 | 4520093 | -   | TTCCGACGAATTT | frameshift insertion | YAP-binding/ALF4/Glomulin                     |
| TWF1042 | EYR41_005093 | scaffold_3 | 1186858 | 1186858 | -   | T             | frameshift insertion | Protein kinase domain                         |
| TWF1042 | EYR41_008629 | scaffold_5 | 3181771 | 3181771 | T   | -             | frameshift deletion  | Protein of unknown function DUF4246           |
| TWF1043 | EYR41_005196 | scaffold_3 | 1505468 | 1505468 | -   | TA            | stop-gain            | MFS transporter superfamily                   |
| TWF1046 | EYR41_003064 | scaffold_2 | 1780257 | 1780257 | A   | C             | stop-gain            | Velvet domain                                 |
| TWF1046 | EYR41_010493 | scaffold_7 | 1849994 | 1849994 | A   | T             | nonsynonymous SNV    | Domain of unknown function DUF2183            |

## 387 References

- 388 1. Arai, T., Kasper, J.S., Skaar, J.R., Ali, S.H., Takahashi, C., and DeCaprio,  
389 J.A.J.P.o.t.N.A.o.S. (2003). Targeted disruption of p185/Cul7 gene results in  
390 abnormal vascular morphogenesis. *Proceedings of the National Academy of*  
391 *Sciences* 100, 9855-9860.
- 392 2. Bolger, A.M., Lohse, M., and Usadel, B.J.B. (2014). Trimmomatic: a flexible  
393 trimmer for Illumina sequence data. *Bioinformatics* 30, 2114-2120.
- 394 3. DiDonato, R.J., Arbuckle, E., Buker, S., Sheets, J., Tobar, J., Totong, R., Grisafi,  
395 P., Fink, G.R., and Celenza, J.L.J.T.P.J. (2004). Arabidopsis ALF4 encodes a  
396 nuclear-localized protein required for lateral root formation. *The Plant Journal* 37,  
397 340-353.
- 398 4. Ellegren, H.J.T.i.e., and evolution (2014). Genome sequencing and population  
399 genomics in non-model organisms. *Trends in ecology & evolution* 29, 51-63.
- 400 5. Gray, N.F. (1983). *Ecology of nematophagous fungi: Distribution and habitat.*  
401 *Annals of Applied Biology* 102, 501-509.
- 402 6. Gulshan, K., Rovinsky, S.A., and Moye-Rowley, W.S.J.E.c. (2004). YBP1 and its  
403 homologue YBP2/YBH1 influence oxidative-stress tolerance by nonidentical  
404 mechanisms in *Saccharomyces cerevisiae*. *Eukaryot Cell* 3, 318-330.
- 405 7. Hsueh, Y.P., Gronquist, M.R., Schwarz, E.M., Nath, R.D., Lee, C.H., Gharib, S.,  
406 Schroeder, F.C., and Sternberg, P.W. (2017). Nematophagous fungus *Arthrobotrys*  
407 *oligospora* mimics olfactory cues of sex and food to lure its nematode prey. *eLife*  
408 6.
- 409 8. Hsueh, Y.P., Mahanti, P., Schroeder, F.C., and Sternberg, P.W. *Current Biology*  
410 (2013). Nematode-trapping fungi eavesdrop on nematode pheromones. *Curr Biol*  
411 23, 83-86.
- 412 9. Li, H., and Durbin, R.J.b. (2009). Fast and accurate short read alignment with  
413 Burrows–Wheeler transform. *Bioinformatics* 25, 1754-1760.
- 414 10. Li, H.J.a.p.a. (2013). Aligning sequence reads, clone sequences and assembly  
415 contigs with BWA-MEM. *arXiv* :1303.3997 [q-bio.GN]
- 416 11. Li, H.J.B. (2011). A statistical framework for SNP calling, mutation discovery,  
417 association mapping and population genetical parameter estimation from  
418 sequencing data. *Bioinformatics* 27, 2987-2993.
- 419 12. Li, J., Wu, R., Wang, M., Borneman, J., Yang, J., and Zhang, K.-Q.J.F.b. (2019).  
420 The pH sensing receptor AopalH plays important roles in the nematophagous  
421 fungus *Arthrobotrys oligospora*. *Fungal biology* 123, 547-554.
- 422 13. Li, X., Kang, Y.-Q., Luo, Y.-L., Zhang, K.-Q., Zou, C.-G., and Liang, L.-M.J.J.o.M.  
423 (2017). The NADPH oxidase AoNoxA in *Arthrobotrys oligospora* functions as an

- 424 initial factor in the infection of *Caenorhabditis elegans*. *Journal of Microbiology*  
425 55, 885-891.
- 426 14. Lopez-Llorca, L.V., Maciá-Vicente, J.G., and Jansson, H.B. (2007). Mode of  
427 Action and Interactions of Nematophagous Fungi. *In Integrated management and*  
428 *biocontrol of vegetable and grain crops nematodes*. Springer, Dordrecht 2, 51-76.
- 429 15. Nordbring-Hertz, B., Jansson, H.-B., and Tunlid, A. (2011). Nematophagous fungi.
- 430 16. Poplin, R., Ruano-Rubio, V., DePristo, M.A., Fennell, T.J., Carneiro, M.O., Van  
431 der Auwera, G.A., Kling, D.E., Gauthier, L.D., Levy-Moonshine, A., and Roazen,  
432 D.J.B. (2017). Scaling accurate genetic variant discovery to tens of thousands of  
433 samples. *bioRxiv*, 201178.
- 434 17. Russell, J.J., Theriot, J.A., Sood, P., Marshall, W.F., Landweber, L.F., Fritz-Laylin,  
435 L., Polka, J.K., Oliferenko, S., Gerbich, T., and Gladfelter, A.J.B.b. (2017). Non-  
436 model model organisms. *BMC biology* 15, 1-31.
- 437 18. Wang, K., Li, M., and Hakonarson, H.J.N.a.r. (2010). ANNOVAR: functional  
438 annotation of genetic variants from high-throughput sequencing data. *Nucleic*  
439 *Acids Research* 38, e164-e164.
- 440 19. Wang, R., Wang, J., and Yang, X. (2015). The extracellular bioactive substances  
441 of *Arthrobotrys oligospora* during the nematode-trapping process. *Biological*  
442 *Control* 86, 60-65.
- 443 20. Wu, B., Hussain, M., Zhang, W., Stadler, M., Liu, X., and Xiang, M.J.M. (2019).  
444 Current insights into fungal species diversity and perspective on naming the  
445 environmental DNA sequences of fungi. *Mycology* 10, 127-140.
- 446 21. Yang, C.T., Vidal-Diez de Ulzurrun, G., Goncalves, A.P., Lin, H.C., Chang, C.W.,  
447 Huang, T.Y., Chen, S.A., Lai, C.K., Tsai, I.J., Schroeder, F.C., *et al.* (2020). Natural  
448 diversity in the predatory behavior facilitates the establishment of a robust model  
449 strain for nematode-trapping fungi. *Proceedings of the National Academy of*  
450 *Sciences U S A*.
- 451 22. Youssar, L., Wernet, V., Hensel, N., Yu, X., Hildebrand, H.-G., Schreckenberger,  
452 B., Kriegler, M., Hetzer, B., Frankino, P., and Dillin, A.J.P.g. (2019). Intercellular  
453 communication is required for trap formation in the nematode-trapping fungus  
454 *Duddingtonia flagrans*. *Plos Genetics* 15, e1008029.
- 455 23. Zhen, Z., Xing, X., Xie, M., Yang, L., Yang, X., Zheng, Y., Chen, Y., Ma, N., Li,  
456 Q., Zhang, K.-Q.J.F.G., *et al.* (2018). MAP kinase Slt2 orthologs play similar roles  
457 in conidiation, trap formation, and pathogenicity in two nematode-trapping fungi.  
458 *Fungal Genetics and Biology* 116, 42-50.

459
